# Supplementary material for: Impact of phenolic-rich olive leaf extract on blood pressure, plasma lipids and inflammatory markers: a randomised controlled trial
Source: Eur J Nutr. 2016 Mar 7;56(4):1421–32. doi: 10.1007/s00394-016-1188-y (PMC5486627; doi:10.1007/s00394-016-1188-y)
Supplement: Supplementary file 1 — Supplementary material 1 (DOCX 18 kb) [file 394_2016_1188_MOESM1_ESM.docx]

# Article title: Impact of phenolic-rich olive leaf extract on blood pressure, plasma lipids an inflammatory markers – a randomised controlled trial

# Journal name: European Journal of Nutrition

Author names: Authors: Stacey Lockyer1, Ian Rowland1, Jeremy Paul Edward Spencer1, Parveen Yaqoob1, Welma Stonehouse2, 3

Affiliations:

1Hugh Sinclair Unit of Human Nutrition, Department of Food and Nutritional Sciences, University of Reading, Berkshire, RG6 6AP, UK

2School of Food and Nutrition, College of Health, Massey University, New Zealand

3Food and Nutrition Flagship, Commonwealth Scientific Industrial Research Organisation (CSIRO), Adelaide, Australia.

Corresponding author: Professor Jeremy Paul Edward Spencer; address: Hugh Sinclair Unit of Human Nutrition, Department of Food and Nutritional Sciences, University of Reading, Berkshire, RG6 6AP, UK; telephone: [+44 (0) 118 378 8724](tel:+44%20(0)%20118%20378%208724), fax: 0118 931 0080

**Table S1: Body composition data derived via bioelectrical impedance**

| Variable | OLE | | | Control | | | OLE vs. Control  Mean difference (SD) | n | p ‡ |
| --- | --- | --- | --- | --- | --- | --- | --- | --- | --- |
| Baseline | End | Mean change (SD) | Baseline | End | Mean change (SD) |
| Weight (kg) | 85.14 (± 12.29) | 85.11 (±12.58) | -0.03 (±1.31) | 84.56 (±12.41) | 84.92 (±12.57) | 0.37 (±1.37) | 0.40 (±1.78) | 48 | 0.131 |
| Body fat (kg) | 19.41 (±7.19) | 19.24 (±7.66) | -0.17 (±1.41) | 18.87 (±7.51) | 19.00 (±7.80) | 0.13 (±1.44) | -0.30 (±1.76) | 48 | 0.245 |
| Fat free mass (kg) | 65.73 (±8.52) | 65.87 (±8.53) | 0.14 (±1.37) | 65.68 (±8.36) | 65.92 (±8.47) | 0.24 (±1.60) | -0.10 (±2.10) | 48 | 0.753 |
| BMI (kg/m²) | 26.66 (±3.21) | 26.65 (±3.27) | -0.01 (±0.40) | 26.50 (±3.21) | 26.57 (±3.33) | 0.08 (±0.41) | -0.09 (±0.56) | 48 | 0.277 |
| % body fat | 22.41 (±6.09) | 22.17 (±6.39) | -0.24 (±1.40) | 21.87 (±6.44) | 21.90 (±6.61) | -0.02 (±1.70) | -0.26 (±2.10) | 48 | 0.395 |

‡Values derived from paired student’s t –tests comparing OLE mean change values with control mean change values

BMI, body mass index
